# Supplementary material for: High Accuracy and Safety of Intraoperative CT-Guided Navigation for Transpedicular Screw Placement in Revision Spinal Surgery
Source: MDPI journal article supplement (doi:10.3390/jcm11195853), 2022-10-02
Supplement: s1 [file s1]

Table S1. Demographic and Perioperative Data.

| No | Age | Sex | Category of Etiology | Virgin Site Screws |                   | Revision Site screws |                   | Exchanged Screws |
|----|-----|-----|----------------------|--------------------|-------------------|----------------------|-------------------|------------------|
|    |     |     |                      | Accepted screws    | Unaccepted screws | Accepted screws      | Unaccepted screws |                  |
| 1  | 70  | F   | ASD                  | 6                  | 0                 | 2                    | 0                 | 4                |
| 2  | 72  | M   | PLI                  | 2                  | 0                 | 6                    | 1(M)              | 0                |
| 3  | 92  | F   | PLI                  | 0                  | 0                 | 6                    | 0                 | 0                |
| 4  | 74  | F   | Infection            | 4                  | 0                 | 0                    | 0                 | 6                |
| 5  | 76  | F   | MOS                  | 4                  | 0                 | 6                    | 0                 | 0                |
| 6  | 55  | M   | ASD                  | 6                  | 0                 | 0                    | 0                 | 6                |
| 7  | 73  | F   | PLI                  | 6                  | 0                 | 6                    | 1(L)              | 0                |
| 8  | 72  | M   | PLI                  | 4                  | 0                 | 4                    | 0                 | 0                |
| 9  | 67  | F   | MOS                  | 4                  | 0                 | 2                    | 0                 | 2                |
| 10 | 76  | F   | ASD                  | 6                  | 0                 | 0                    | 0                 | 6                |
| 11 | 75  | M   | MOS                  | 0                  | 0                 | 1                    | 0                 | 0                |
| 12 | 73  | F   | ASD                  | 2                  | 0                 | 4                    | 0                 | 12               |
| 13 | 81  | F   | ASD                  | 0                  | 0                 | 2                    | 0                 | 0                |
| 14 | 61  | F   | PLI                  | 0                  | 0                 | 8                    | 1(M)              | 0                |
| 15 | 55  | M   | PLI                  | 2                  | 0                 | 6                    | 0                 | 0                |
| 16 | 47  | M   | PLI                  | 0                  | 0                 | 6                    | 0                 | 0                |
| 17 | 56  | M   | ASD                  | 8                  | 0                 | 0                    | 0                 | 4                |
| 18 | 76  | F   | PLI                  | 2                  | 0                 | 6                    | 1(L)              | 0                |
| 19 | 77  | M   | PLI                  | 2                  | 0                 | 8                    | 0                 | 0                |
| 20 | 48  | F   | MOS                  | 0                  | 0                 | 5                    | 0                 | 4                |
| 21 | 55  | M   | PLI                  | 0                  | 0                 | 8                    | 1(L)              | 4                |
| 22 | 66  | F   | ASD                  | 3                  | 1(M)              | 3                    | 0                 | 0                |
| 23 | 61  | M   | Infection            | 2                  | 0                 | 0                    | 0                 | 6                |
| 24 | 55  | M   | ASD                  | 0                  | 0                 | 2                    | 0                 | 4                |
| 25 | 68  | M   | PLI                  | 0                  | 0                 | 10                   | 0                 | 0                |
| 26 | 60  | F   | ASD                  | 0                  | 0                 | 4                    | 0                 | 6                |
| 27 | 77  | M   | PLI                  | 0                  | 0                 | 4                    | 0                 | 12               |
|    |     |     |                      | 63                 | 1                 | 109                  | 5                 | 76               |

Note. ASD: adjacent segment disease; MOS: malposition of previous transpedicular screw; PLI: post-laminectomy instability; (M): medial breach; (L): lateral breach; Revision site screws: Screws inserted at right over a previous laminectomy or posterolateral fusion field; Virgin site screws: Screws inserted at the site away from previous laminectomy or posterolateral fusion; Exchanged screws: Screws inserted to exchange preexisting screws with different style or brand screws through the previous trajectories.
